# Supplementary material for: New alignment-based sequence extraction software (ALiBaSeq) and its utility for deep level phylogenetics
Source: bioRxiv preprint, doi:10.1101/2020.04.27.064790, version 2 (2020-09-04)
Supplement: Table S1 [file 064790_file04.xlsx]

## Sheet: Sheet1
UCE dataset	ODB SCO dataset	Plant ODB SCO dataset
uce-4	EOG091E0002	EOG09360006
uce-6	EOG091E000F	EOG0936000A
uce-12	EOG091E000N	EOG0936000H
uce-14	EOG091E000R	EOG0936000M
uce-16	EOG091E000U	EOG0936000P
uce-17	EOG091E000X	EOG0936000W
uce-22	EOG091E0017	EOG09360015
uce-23	EOG091E001B	EOG09360016
uce-26	EOG091E001G	EOG09360017
uce-27	EOG091E001I	EOG0936001H
uce-28	EOG091E001K	EOG0936001J
uce-29	EOG091E001R	EOG0936001K
uce-30	EOG091E001U	EOG0936001W
uce-31	EOG091E001W	EOG0936001Z
uce-37	EOG091E0022	EOG09360020
uce-39	EOG091E0026	EOG09360022
uce-40	EOG091E002H	EOG09360026
uce-46	EOG091E002K	EOG09360029
uce-49	EOG091E002L	EOG0936002C
uce-54	EOG091E002S	EOG0936002D
uce-57	EOG091E0032	EOG0936002P
uce-58	EOG091E0033	EOG09360038
uce-61	EOG091E0035	EOG0936003E
uce-62	EOG091E0037	EOG0936003K
uce-63	EOG091E003J	EOG0936003L
uce-67	EOG091E0045	EOG0936004H
uce-69	EOG091E004C	EOG0936004I
uce-79	EOG091E004D	EOG0936004K
uce-81	EOG091E004H	EOG0936004R
uce-83	EOG091E004I	EOG0936004V
uce-86	EOG091E004O	EOG09360051
uce-97	EOG091E004Q	EOG09360058
uce-98	EOG091E0051	EOG0936005B
uce-99	EOG091E0056	EOG0936005U
uce-100	EOG091E0057	EOG0936005Y
uce-103	EOG091E005A	EOG0936005Z
uce-105	EOG091E005B	EOG09360064
uce-106	EOG091E005C	EOG0936006A
uce-107	EOG091E005H	EOG0936006F
uce-110	EOG091E005I	EOG09360076
uce-113	EOG091E005P	EOG0936007F
uce-114	EOG091E005Q	EOG0936007P
uce-115	EOG091E005R	EOG09360082
uce-116	EOG091E0062	EOG09360084
uce-117	EOG091E0064	EOG0936008K
uce-123	EOG091E0068	EOG0936008L
uce-124	EOG091E006A	EOG0936008M
uce-125	EOG091E006N	EOG09360091
uce-126	EOG091E006W	EOG0936009F
uce-129	EOG091E006Z	EOG0936009W
uce-130	EOG091E0071	EOG093600AC
uce-131	EOG091E007B	EOG093600AE
uce-132	EOG091E007F	EOG093600AH
uce-134	EOG091E007I	EOG093600AM
uce-135	EOG091E007O	EOG093600AV
uce-138	EOG091E007R	EOG093600AY
uce-139	EOG091E007W	EOG093600BW
uce-142	EOG091E0088	EOG093600CF
uce-147	EOG091E008D	EOG093600CH
uce-148	EOG091E008K	EOG093600CL
uce-149	EOG091E008M	EOG093600CU
uce-150	EOG091E008N	EOG093600CZ
uce-151	EOG091E008O	EOG093600D9
uce-155	EOG091E0092	EOG093600DJ
uce-156	EOG091E0096	EOG093600DL
uce-178	EOG091E009D	EOG093600EH
uce-190	EOG091E009H	EOG093600EK
uce-191	EOG091E009J	EOG093600EQ
uce-197	EOG091E009L	EOG093600FF
uce-199	EOG091E009P	EOG093600FM
uce-203	EOG091E009Q	EOG093600FQ
uce-206	EOG091E009R	EOG093600FR
uce-208	EOG091E009S	EOG093600FS
uce-209	EOG091E009V	EOG093600FV
uce-211	EOG091E009Z	EOG093600G6
uce-213	EOG091E00A4	EOG093600G8
uce-214	EOG091E00A5	EOG093600GE
uce-216	EOG091E00A6	EOG093600GF
uce-217	EOG091E00AD	EOG093600GG
uce-219	EOG091E00AH	EOG093600GL
uce-221	EOG091E00AI	EOG093600GM
uce-222	EOG091E00AO	EOG093600GN
uce-223	EOG091E00AQ	EOG093600GR
uce-230	EOG091E00AR	EOG093600H1
uce-231	EOG091E00AV	EOG093600HH
uce-232	EOG091E00AW	EOG093600HR
uce-233	EOG091E00AY	EOG093600HT
uce-234	EOG091E00B7	EOG093600HZ
uce-237	EOG091E00B9	EOG093600I8
uce-238	EOG091E00BJ	EOG093600IF
uce-239	EOG091E00BK	EOG093600IG
uce-243	EOG091E00BM	EOG093600II
uce-244	EOG091E00BN	EOG093600IQ
uce-245	EOG091E00BR	EOG093600IR
uce-246	EOG091E00BT	EOG093600IT
uce-248	EOG091E00BY	EOG093600IV
uce-249	EOG091E00C3	EOG093600IY
uce-257	EOG091E00C8	EOG093600JE
uce-259	EOG091E00CD	EOG093600JT
uce-260	EOG091E00CE	EOG093600K0
uce-264	EOG091E00CO	EOG093600KB
uce-265	EOG091E00CU	EOG093600KR
uce-267	EOG091E00CX	EOG093600KX
uce-272	EOG091E00CZ	EOG093600L1
uce-275	EOG091E00D2	EOG093600L9
uce-276	EOG091E00D9	EOG093600LV
uce-279	EOG091E00DC	EOG093600MD
uce-280	EOG091E00DG	EOG093600ME
uce-281	EOG091E00DJ	EOG093600MF
uce-283	EOG091E00DN	EOG093600MK
uce-289	EOG091E00DP	EOG093600MX
uce-290	EOG091E00DU	EOG093600N9
uce-291	EOG091E00DW	EOG093600NP
uce-293	EOG091E00E2	EOG093600NS
uce-296	EOG091E00E4	EOG093600NU
uce-298	EOG091E00EH	EOG093600NW
uce-299	EOG091E00EK	EOG093600O1
uce-301	EOG091E00EP	EOG093600O6
uce-302	EOG091E00EV	EOG093600OD
uce-304	EOG091E00F4	EOG093600OF
uce-307	EOG091E00F6	EOG093600ON
uce-308	EOG091E00F8	EOG093600OR
uce-309	EOG091E00FB	EOG093600OU
uce-310	EOG091E00FC	EOG093600OW
uce-312	EOG091E00FI	EOG093600P2
uce-313	EOG091E00FL	EOG093600P9
uce-314	EOG091E00FO	EOG093600PE
uce-316	EOG091E00FP	EOG093600Q2
uce-319	EOG091E00FS	EOG093600QJ
uce-323	EOG091E00G4	EOG093600QQ
uce-325	EOG091E00GE	EOG093600R5
uce-326	EOG091E00GF	EOG093600RC
uce-330	EOG091E00GG	EOG093600RL
uce-331	EOG091E00GI	EOG093600RY
uce-339	EOG091E00GT	EOG093600S1
uce-344	EOG091E00GV	EOG093600SH
uce-353	EOG091E00GY	EOG093600SL
uce-365	EOG091E00H3	EOG093600SP
uce-368	EOG091E00HM	EOG093600SS
uce-369	EOG091E00HP	EOG093600SX
uce-371	EOG091E00HR	EOG093600SY
uce-372	EOG091E00HS	EOG093600T2
uce-373	EOG091E00HV	EOG093600T6
uce-374	EOG091E00I2	EOG093600TG
uce-376	EOG091E00I9	EOG093600TZ
uce-377	EOG091E00IO	EOG093600U9
uce-383	EOG091E00J0	EOG093600UJ
uce-384	EOG091E00J3	EOG093600UK
uce-385	EOG091E00J4	EOG093600UR
uce-387	EOG091E00J5	EOG093600UV
uce-390	EOG091E00J6	EOG093600UW
uce-392	EOG091E00J7	EOG093600UX
uce-393	EOG091E00JA	EOG093600UY
uce-394	EOG091E00JE	EOG093600VB
uce-395	EOG091E00JG	EOG093600W2
uce-402	EOG091E00JJ	EOG093600W7
uce-406	EOG091E00JL	EOG093600W8
uce-407	EOG091E00JQ	EOG093600WJ
uce-408	EOG091E00JW	EOG093600WS
uce-409	EOG091E00JY	EOG093600WW
uce-410	EOG091E00K1	EOG093600XF
uce-414	EOG091E00K7	EOG093600XH
uce-417	EOG091E00K9	EOG093600XK
uce-418	EOG091E00KA	EOG093600XL
uce-420	EOG091E00KF	EOG093600XM
uce-423	EOG091E00KG	EOG093600XZ
uce-440	EOG091E00KN	EOG093600YG
uce-442	EOG091E00KS	EOG093600YJ
uce-443	EOG091E00KT	EOG093600YN
uce-444	EOG091E00KX	EOG093600YX
uce-445	EOG091E00KZ	EOG093600Z7
uce-446	EOG091E00LG	EOG093600ZL
uce-447	EOG091E00LH	EOG093600ZU
uce-448	EOG091E00LO	EOG09360100
uce-449	EOG091E00LQ	EOG09360105
uce-450	EOG091E00LR	EOG0936010Y
uce-451	EOG091E00LW	EOG0936010Z
uce-453	EOG091E00LY	EOG09360116
uce-454	EOG091E00LZ	EOG0936011U
uce-459	EOG091E00M2	EOG0936011V
uce-461	EOG091E00M3	EOG09360121
uce-467	EOG091E00ME	EOG0936012G
uce-477	EOG091E00MG	EOG0936012L
uce-481	EOG091E00MH	EOG0936013C
uce-482	EOG091E00MI	EOG0936013E
uce-483	EOG091E00MS	EOG0936013F
uce-493	EOG091E00MX	EOG0936013O
uce-497	EOG091E00N3	EOG0936013U
uce-502	EOG091E00N6	EOG09360146
uce-508	EOG091E00N7	EOG0936014H
uce-509	EOG091E00N8	EOG0936014L
uce-511	EOG091E00NB	EOG0936014R
uce-512	EOG091E00NC	EOG0936014Y
uce-523	EOG091E00NF	EOG09360152
uce-524	EOG091E00NG	EOG09360154
uce-525	EOG091E00NH	EOG0936015D
uce-526	EOG091E00NK	EOG0936015G
uce-527	EOG091E00NO	EOG0936015N
uce-528	EOG091E00O2	EOG0936015V
uce-534	EOG091E00O3	EOG0936015X
uce-535	EOG091E00O4	EOG0936015Z
uce-537	EOG091E00OB	EOG0936016G
uce-540	EOG091E00OD	EOG0936016J
uce-541	EOG091E00OG	EOG09360174
uce-543	EOG091E00OL	EOG0936017C
uce-544	EOG091E00OO	EOG0936017F
uce-545	EOG091E00OT	EOG0936017O
uce-550	EOG091E00OU	EOG0936017P
uce-555	EOG091E00OZ	EOG0936017Q
uce-556	EOG091E00P3	EOG09360182
uce-558	EOG091E00P8	EOG0936018E
uce-560	EOG091E00P9	EOG09360197
uce-561	EOG091E00PG	EOG09360199
uce-566	EOG091E00PM	EOG0936019C
uce-567	EOG091E00PY	EOG0936019E
uce-568	EOG091E00Q4	EOG0936019P
uce-577	EOG091E00Q9	EOG093601A0
uce-578	EOG091E00QB	EOG093601A9
uce-579	EOG091E00QE	EOG093601AL
uce-581	EOG091E00QJ	EOG093601AN
uce-582	EOG091E00QN	EOG093601AX
uce-583	EOG091E00QQ	EOG093601AY
uce-585	EOG091E00QR	EOG093601B2
uce-586	EOG091E00QY	EOG093601BO
uce-588	EOG091E00QZ	EOG093601C3
uce-589	EOG091E00R2	EOG093601CB
uce-590	EOG091E00R9	EOG093601CE
uce-591	EOG091E00RD	EOG093601CM
uce-592	EOG091E00RE	EOG093601CN
uce-593	EOG091E00RN	EOG093601CY
uce-597	EOG091E00RO	EOG093601D2
uce-599	EOG091E00RR	EOG093601D8
uce-601	EOG091E00RT	EOG093601DR
uce-604	EOG091E00RW	EOG093601DT
uce-605	EOG091E00RX	EOG093601DV
uce-606	EOG091E00S7	EOG093601E4
uce-607	EOG091E00SE	EOG093601EB
uce-609	EOG091E00SL	EOG093601ED
uce-611	EOG091E00SS	EOG093601F3
uce-613	EOG091E00T0	EOG093601F8
uce-617	EOG091E00TC	EOG093601FF
uce-618	EOG091E00TG	EOG093601FH
uce-621	EOG091E00TI	EOG093601G0
uce-622	EOG091E00TK	EOG093601G4
uce-626	EOG091E00TL	EOG093601GC
uce-627	EOG091E00TO	EOG093601GT
uce-628	EOG091E00TS	EOG093601H0
uce-632	EOG091E00TV	EOG093601H4
uce-633	EOG091E00TZ	EOG093601IJ
uce-634	EOG091E00U1	EOG093601IL
uce-635	EOG091E00U4	EOG093601IV
uce-637	EOG091E00UA	EOG093601IY
uce-643	EOG091E00UH	EOG093601J1
uce-646	EOG091E00UJ	EOG093601J4
uce-652	EOG091E00UM	EOG093601JA
uce-653	EOG091E00UN	EOG093601JI
uce-655	EOG091E00UQ	EOG093601JY
uce-658	EOG091E00VJ	EOG093601K1
uce-659	EOG091E00VO	EOG093601KV
uce-660	EOG091E00VQ	EOG093601KY
uce-667	EOG091E00VW	EOG093601KZ
uce-668	EOG091E00W1	EOG093601L3
uce-669	EOG091E00WJ	EOG093601LD
uce-672	EOG091E00WK	EOG093601LF
uce-676	EOG091E00WL	EOG093601LJ
uce-679	EOG091E00WR	EOG093601LL
uce-703	EOG091E00WW	EOG093601LN
uce-707	EOG091E00X3	EOG093601M6
uce-708	EOG091E00X6	EOG093601MC
uce-722	EOG091E00XE	EOG093601MF
uce-732	EOG091E00XH	EOG093601MI
uce-738	EOG091E00XJ	EOG093601MK
uce-739	EOG091E00XL	EOG093601ML
uce-744	EOG091E00XO	EOG093601MU
uce-745	EOG091E00XQ	EOG093601NB
uce-749	EOG091E00XR	EOG093601NJ
uce-750	EOG091E00XY	EOG093601NK
uce-756	EOG091E00Y6	EOG093601O1
uce-758	EOG091E00YF	EOG093601O6
uce-760	EOG091E00YT	EOG093601O9
uce-767	EOG091E00YY	EOG093601OJ
uce-771	EOG091E00Z0	EOG093601OK
uce-779	EOG091E00Z6	EOG093601OU
uce-781	EOG091E00ZN	EOG093601P1
uce-787	EOG091E00ZT	EOG093601P3
uce-788	EOG091E00ZU	EOG093601P7
uce-790	EOG091E00ZX	EOG093601P9
uce-792	EOG091E0101	EOG093601PF
uce-804	EOG091E0103	EOG093601PJ
uce-806	EOG091E0106	EOG093601PM
uce-807	EOG091E0108	EOG093601PV
uce-808	EOG091E010B	EOG093601PZ
uce-811	EOG091E010F	EOG093601QB
uce-812	EOG091E010L	EOG093601QL
uce-817	EOG091E010M	EOG093601RJ
uce-818	EOG091E010N	EOG093601RW
uce-824	EOG091E010T	EOG093601S9
uce-825	EOG091E0116	EOG093601SG
uce-835	EOG091E011C	EOG093601SK
uce-836	EOG091E011E	EOG093601SL
uce-841	EOG091E011G	EOG093601SQ
uce-844	EOG091E011K	EOG093601SU
uce-845	EOG091E011O	EOG093601T3
uce-847	EOG091E011T	EOG093601T9
uce-850	EOG091E011U	EOG093601TC
uce-851	EOG091E011V	EOG093601TD
uce-852	EOG091E011Y	EOG093601TM
uce-853	EOG091E011Z	EOG093601TO
uce-854	EOG091E0129	EOG093601U2
uce-856	EOG091E012D	EOG093601UA
uce-858	EOG091E012E	EOG093601UB
uce-859	EOG091E012Y	EOG093601UC
uce-861	EOG091E0133	EOG093601UH
uce-862	EOG091E013E	EOG093601V0
uce-863	EOG091E013N	EOG093601VC
uce-865	EOG091E013Q	EOG093601VG
uce-866	EOG091E013V	EOG093601WC
uce-867	EOG091E013X	EOG093601WK
uce-883	EOG091E0141	EOG093601WP
uce-884	EOG091E0143	EOG093601XH
uce-886	EOG091E014F	EOG093601XL
uce-888	EOG091E014H	EOG093601Y5
uce-889	EOG091E014I	EOG093601YO
uce-891	EOG091E014M	EOG093601ZW
uce-892	EOG091E014O	EOG09360206
uce-894	EOG091E015G	EOG0936020H
uce-895	EOG091E015J	EOG0936020J
uce-897	EOG091E0160	EOG0936020T
uce-899	EOG091E0161	EOG09360212
uce-909	EOG091E0165	EOG0936021C
uce-911	EOG091E0166	EOG0936021H
uce-913	EOG091E016C	EOG0936021O
uce-918	EOG091E016E	EOG0936021X
uce-919	EOG091E016G	EOG09360222
uce-920	EOG091E016J	EOG0936022F
uce-930	EOG091E016L	EOG0936023A
uce-931	EOG091E016Z	EOG0936023D
uce-932	EOG091E0174	EOG0936023L
uce-936	EOG091E0177	EOG0936023M
uce-944	EOG091E017A	EOG0936023S
uce-945	EOG091E017B	EOG0936023Y
uce-946	EOG091E017D	EOG0936024I
uce-949	EOG091E017O	EOG0936024J
uce-952	EOG091E017P	EOG0936024P
uce-953	EOG091E017S	EOG0936025F
uce-954	EOG091E017W	EOG0936025L
uce-959	EOG091E017Z	EOG0936026H
uce-961	EOG091E0180	EOG0936026Q
uce-964	EOG091E018F	EOG0936026S
uce-965	EOG091E018I	EOG0936027A
uce-966	EOG091E018J	EOG0936027I
uce-970	EOG091E018Q	EOG0936027N
uce-975	EOG091E018R	EOG0936027O
uce-979	EOG091E018S	EOG0936027U
uce-985	EOG091E0196	EOG09360287
uce-987	EOG091E019E	EOG0936028I
uce-988	EOG091E019G	EOG0936028K
uce-998	EOG091E019J	EOG0936028O
uce-999	EOG091E019M	EOG0936028R
uce-1006	EOG091E019N	EOG0936028U
uce-1009	EOG091E019R	EOG0936028V
uce-1010	EOG091E019V	EOG0936028Z
uce-1014	EOG091E019Z	EOG09360296
uce-1018	EOG091E01A1	EOG0936029A
uce-1022	EOG091E01A2	EOG093602A0
uce-1024	EOG091E01A4	EOG093602A2
uce-1027	EOG091E01AR	EOG093602A6
uce-1029	EOG091E01AU	EOG093602AY
uce-1030	EOG091E01AX	EOG093602BJ
uce-1031	EOG091E01AZ	EOG093602BO
uce-1033	EOG091E01B1	EOG093602BR
uce-1034	EOG091E01BA	EOG093602BV
uce-1036	EOG091E01BB	EOG093602C3
uce-1039	EOG091E01BF	EOG093602C4
uce-1042	EOG091E01BL	EOG093602CY
uce-1044	EOG091E01BV	EOG093602D5
uce-1045	EOG091E01C0	EOG093602DI
uce-1046	EOG091E01C2	EOG093602DK
uce-1047	EOG091E01CD	EOG093602DX
uce-1048	EOG091E01CE	EOG093602E8
uce-1050	EOG091E01CG	EOG093602EO
uce-1054	EOG091E01CN	EOG093602EQ
uce-1055	EOG091E01CO	EOG093602EU
uce-1063	EOG091E01CS	EOG093602EY
uce-1064	EOG091E01CU	EOG093602F2
uce-1065	EOG091E01CX	EOG093602FR
uce-1066	EOG091E01D4	EOG093602FV
uce-1071	EOG091E01D5	EOG093602GO
uce-1074	EOG091E01DG	EOG093602GP
uce-1075	EOG091E01DI	EOG093602GY
uce-1077	EOG091E01DO	EOG093602H1
uce-1080	EOG091E01DQ	EOG093602HL
uce-1081	EOG091E01DU	EOG093602HR
uce-1089	EOG091E01DV	EOG093602I0
uce-1090	EOG091E01DX	EOG093602I5
uce-1091	EOG091E01DZ	EOG093602IE
uce-1092	EOG091E01E3	EOG093602IF
uce-1093	EOG091E01E8	EOG093602IG
uce-1096	EOG091E01E9	EOG093602IK
uce-1097	EOG091E01EC	EOG093602IW
uce-1103	EOG091E01EI	EOG093602JB
uce-1106	EOG091E01EL	EOG093602JI
uce-1108	EOG091E01EN	EOG093602JN
uce-1110	EOG091E01EP	EOG093602JP
uce-1114	EOG091E01EQ	EOG093602JY
uce-1115	EOG091E01ET	EOG093602K0
uce-1116	EOG091E01EU	EOG093602KH
uce-1117	EOG091E01EW	EOG093602KP
uce-1121	EOG091E01F6	EOG093602M1
uce-1122	EOG091E01FJ	EOG093602M4
uce-1123	EOG091E01FQ	EOG093602MF
uce-1130	EOG091E01FS	EOG093602MG
uce-1131	EOG091E01FV	EOG093602MY
uce-1138	EOG091E01G4	EOG093602N6
uce-1140	EOG091E01GF	EOG093602N7
uce-1142	EOG091E01GN	EOG093602NS
uce-1143	EOG091E01GU	EOG093602NV
uce-1150	EOG091E01GZ	EOG093602O3
uce-1152	EOG091E01H9	EOG093602O6
uce-1153	EOG091E01HF	EOG093602OC
uce-1156	EOG091E01HQ	EOG093602OH
uce-1166	EOG091E01HT	EOG093602OJ
uce-1168	EOG091E01HW	EOG093602ON
uce-1169	EOG091E01I2	EOG093602P0
uce-1171	EOG091E01I3	EOG093602P3
uce-1175	EOG091E01I6	EOG093602PW
uce-1182	EOG091E01I8	EOG093602PZ
uce-1183	EOG091E01IA	EOG093602QV
uce-1184	EOG091E01IB	EOG093602R1
uce-1186	EOG091E01II	EOG093602RY
uce-1187	EOG091E01IL	EOG093602S0
uce-1188	EOG091E01IO	EOG093602S5
uce-1190	EOG091E01IP	EOG093602S7
uce-1191	EOG091E01J0	EOG093602SI
uce-1196	EOG091E01J7	EOG093602SP
uce-1199	EOG091E01JF	EOG093602SS
uce-1200	EOG091E01JH	EOG093602T8
uce-1201	EOG091E01JI	EOG093602TY
uce-1206	EOG091E01JK	EOG093602U4
uce-1207	EOG091E01JR	EOG093602UJ
uce-1208	EOG091E01K0	EOG093602UL
uce-1209	EOG091E01K3	EOG093602V4
uce-1213	EOG091E01K6	EOG093602VB
uce-1215	EOG091E01K7	EOG093602VC
uce-1219	EOG091E01KA	EOG093602VE
uce-1221	EOG091E01KH	EOG093602VM
uce-1226	EOG091E01KS	EOG093602W9
uce-1227	EOG091E01KW	EOG093602WA
uce-1228	EOG091E01KZ	EOG093602WH
uce-1230	EOG091E01L2	EOG093602WM
uce-1231	EOG091E01L5	EOG093602WP
uce-1234	EOG091E01L7	EOG093602X1
uce-1237	EOG091E01LB	EOG093602X4
uce-1238	EOG091E01LC	EOG093602X5
uce-1245	EOG091E01LF	EOG093602XB
uce-1246	EOG091E01LM	EOG093602XZ
uce-1248	EOG091E01LT	EOG093602Y2
uce-1251	EOG091E01M4	EOG093602Y5
uce-1253	EOG091E01M6	EOG093602Y9
uce-1255	EOG091E01MB	EOG093602YB
uce-1256	EOG091E01ME	EOG093602YD
uce-1258	EOG091E01MF	EOG093602YE
uce-1259	EOG091E01MH	EOG093602Z6
uce-1260	EOG091E01MQ	EOG093602Z8
uce-1261	EOG091E01N1	EOG093602ZB
uce-1269	EOG091E01N6	EOG093602ZN
uce-1271	EOG091E01N7	EOG09360300
uce-1272	EOG091E01ND	EOG09360306
uce-1274	EOG091E01NN	EOG0936030A
uce-1291	EOG091E01NY	EOG0936031C
uce-1292	EOG091E01O3	EOG0936031D
uce-1296	EOG091E01OC	EOG0936031G
uce-1297	EOG091E01OG	EOG0936031L
uce-1308	EOG091E01OO	EOG0936031Y
uce-1309	EOG091E01OQ	EOG0936032M
uce-1320	EOG091E01OY	EOG0936032P
uce-1332	EOG091E01OZ	EOG09360332
uce-1334	EOG091E01P2	EOG0936033I
uce-1335	EOG091E01P4	EOG0936033V
uce-1338	EOG091E01PD	EOG0936033Y
uce-1345	EOG091E01PG	EOG09360340
uce-1346	EOG091E01PH	EOG0936034N
uce-1351	EOG091E01PL	EOG0936034U
uce-1358	EOG091E01PR	EOG09360358
uce-1359	EOG091E01PX	EOG0936035H
uce-1361	EOG091E01PY	EOG0936035S
uce-1362	EOG091E01Q0	EOG0936035T
uce-1371	EOG091E01Q3	EOG09360367
uce-1375	EOG091E01Q7	EOG0936036G
uce-1377	EOG091E01QA	EOG0936036I
uce-1386	EOG091E01QE	EOG0936036V
uce-1389	EOG091E01QM	EOG0936037B
uce-1393	EOG091E01QT	EOG0936037E
uce-1394	EOG091E01QU	EOG0936037I
uce-1395	EOG091E01QV	EOG0936037Y
uce-1397	EOG091E01QX	EOG09360383
uce-1403	EOG091E01QY	EOG0936038C
uce-1404	EOG091E01R3	EOG0936038D
uce-1405	EOG091E01R5	EOG0936038F
uce-1406	EOG091E01R6	EOG0936038M
uce-1407	EOG091E01RJ	EOG0936038P
uce-1417	EOG091E01RL	EOG0936038S
uce-1419	EOG091E01RM	EOG0936038Z
uce-1425	EOG091E01RN	EOG09360391
uce-1426	EOG091E01RQ	EOG09360394
uce-1427	EOG091E01RS	EOG09360398
uce-1430	EOG091E01RT	EOG0936039J
uce-1431	EOG091E01RU	EOG0936039N
uce-1433	EOG091E01RV	EOG0936039P
uce-1438	EOG091E01S2	EOG0936039Z
uce-1444	EOG091E01S5	EOG093603A5
uce-1449	EOG091E01SA	EOG093603A8
uce-1455	EOG091E01SO	EOG093603AK
uce-1459	EOG091E01SP	EOG093603AR
uce-1460	EOG091E01SQ	EOG093603AZ
uce-1462	EOG091E01SV	EOG093603BB
uce-1464	EOG091E01SX	EOG093603BG
uce-1465	EOG091E01T1	EOG093603BN
uce-1467	EOG091E01T2	EOG093603BR
uce-1468	EOG091E01T4	EOG093603C9
uce-1469	EOG091E01T5	EOG093603CJ
uce-1475	EOG091E01T9	EOG093603CL
uce-1480	EOG091E01TA	EOG093603D0
uce-1497	EOG091E01TD	EOG093603D8
uce-1498	EOG091E01TE	EOG093603DB
uce-1499	EOG091E01TF	EOG093603DD
uce-1500	EOG091E01TG	EOG093603DJ
uce-1501	EOG091E01TJ	EOG093603DN
uce-1502	EOG091E01TR	EOG093603DZ
uce-1504	EOG091E01TS	EOG093603E1
uce-1508	EOG091E01U2	EOG093603E4
uce-1513	EOG091E01U8	EOG093603EB
uce-1519	EOG091E01UC	EOG093603EC
uce-1520	EOG091E01UH	EOG093603EX
uce-1521	EOG091E01UI	EOG093603F5
uce-1525	EOG091E01UK	EOG093603FC
uce-1527	EOG091E01UO	EOG093603FG
uce-1529	EOG091E01UR	EOG093603FS
uce-1539	EOG091E01V8	EOG093603G0
uce-1542	EOG091E01VC	EOG093603G8
uce-1545	EOG091E01VM	EOG093603GC
uce-1547	EOG091E01VO	EOG093603GN
uce-1549	EOG091E01VX	EOG093603GZ
uce-1551	EOG091E01VZ	EOG093603HA
uce-1567	EOG091E01W7	EOG093603HD
uce-1569	EOG091E01WJ	EOG093603HJ
uce-1574	EOG091E01WK	EOG093603HT
uce-1588	EOG091E01WM	EOG093603HX
uce-1589	EOG091E01WS	EOG093603I4
uce-1591	EOG091E01WZ	EOG093603IB
uce-1592	EOG091E01XB	EOG093603II
uce-1593	EOG091E01XF	EOG093603IM
uce-1594	EOG091E01XM	EOG093603IN
uce-1595	EOG091E01XN	EOG093603IO
uce-1596	EOG091E01XU	EOG093603IQ
uce-1599	EOG091E01Y4	EOG093603J1
uce-1601	EOG091E01Y7	EOG093603JB
uce-1603	EOG091E01YA	EOG093603JD
uce-1604	EOG091E01YF	EOG093603K2
uce-1607	EOG091E01YO	EOG093603K3
uce-1608	EOG091E01YU	EOG093603K7
uce-1609	EOG091E01YY	EOG093603K9
uce-1610	EOG091E01Z0	EOG093603KE
uce-1611	EOG091E01Z1	EOG093603KQ
uce-1617	EOG091E01Z3	EOG093603KX
uce-1619	EOG091E01ZC	EOG093603L1
uce-1620	EOG091E01ZG	EOG093603L7
uce-1621	EOG091E01ZP	EOG093603LB
uce-1622	EOG091E01ZQ	EOG093603M5
uce-1623	EOG091E01ZS	EOG093603ML
uce-1624	EOG091E01ZT	EOG093603MM
uce-1625	EOG091E01ZU	EOG093603MT
uce-1627	EOG091E01ZY	EOG093603N7
uce-1628	EOG091E0202	EOG093603NH
uce-1630	EOG091E0207	EOG093603NR
uce-1632	EOG091E0208	EOG093603NT
uce-1634	EOG091E020C	EOG093603NX
uce-1644	EOG091E020F	EOG093603O7
uce-1646	EOG091E020J	EOG093603O8
uce-1649	EOG091E021J	EOG093603OD
uce-1650	EOG091E021P	EOG093603OL
uce-1667	EOG091E021Y	EOG093603OR
uce-1671	EOG091E021Z	EOG093603OU
uce-1672	EOG091E0225	EOG093603P2
uce-1674	EOG091E0228	EOG093603P6
uce-1675	EOG091E0229	EOG093603PD
uce-1676	EOG091E022A	EOG093603PK
uce-1677	EOG091E022D	EOG093603PO
uce-1679	EOG091E022F	EOG093603PP
uce-1681	EOG091E022K	EOG093603QQ
uce-1687	EOG091E022M	EOG093603QV
uce-1688	EOG091E022N	EOG093603QZ
uce-1689	EOG091E022P	EOG093603R2
uce-1694	EOG091E022Q	EOG093603RD
uce-1704	EOG091E022Z	EOG093603RG
uce-1706	EOG091E0230	EOG093603RW
uce-1711	EOG091E0232	EOG093603RY
uce-1712	EOG091E023A	EOG093603SF
uce-1713	EOG091E023G	EOG093603SR
uce-1715	EOG091E023L	EOG093603SV
uce-1716	EOG091E023N	EOG093603SX
uce-1717	EOG091E023S	EOG093603T3
uce-1725	EOG091E0241	EOG093603TC
uce-1726	EOG091E0244	EOG093603TD
uce-1727	EOG091E0245	EOG093603TE
uce-1728	EOG091E0247	EOG093603UC
uce-1729	EOG091E0248	EOG093603UI
uce-1730	EOG091E024A	EOG093603UU
uce-1740	EOG091E024F	EOG093603UW
uce-1748	EOG091E024G	EOG093603V0
uce-1754	EOG091E024O	EOG093603VH
uce-1756	EOG091E024S	EOG093603VO
uce-1759	EOG091E024T	EOG093603VX
uce-1761	EOG091E024U	EOG093603VY
uce-1762	EOG091E024V	EOG093603VZ
uce-1764	EOG091E0255	EOG093603W4
uce-1779	EOG091E0259	EOG093603W7
uce-1780	EOG091E025F	EOG093603W8
uce-1781	EOG091E025K	EOG093603WD
uce-1782	EOG091E025P	EOG093603WH
uce-1784	EOG091E025R	EOG093603WX
uce-1785	EOG091E0267	EOG093603WZ
uce-1790	EOG091E026G	EOG093603X7
uce-1791	EOG091E026I	EOG093603XN
uce-1795	EOG091E026K	EOG093603XO
uce-1798	EOG091E026R	EOG093603XR
uce-1799	EOG091E026T	EOG093603XY
uce-1804	EOG091E026U	EOG093603YM
uce-1805	EOG091E026V	EOG093603YN
uce-1806	EOG091E026W	EOG093603YS
uce-1810	EOG091E026Y	EOG093603Z1
uce-1811	EOG091E0270	EOG093603Z7
uce-1812	EOG091E0274	EOG093603Z9
uce-1814	EOG091E0276	EOG093603ZB
uce-1815	EOG091E0278	EOG093603ZW
uce-1817	EOG091E027F	EOG09360409
uce-1824	EOG091E027H	EOG0936040G
uce-1831	EOG091E027J	EOG0936040O
uce-1832	EOG091E027L	EOG0936040W
uce-1833	EOG091E027S	EOG0936041D
uce-1834	EOG091E0288	EOG0936041Q
uce-1835	EOG091E028B	EOG09360424
uce-1836	EOG091E028D	EOG0936042R
uce-1838	EOG091E028E	EOG0936042S
uce-1844	EOG091E028M	EOG0936042T
uce-1845	EOG091E028P	EOG0936042Y
uce-1868	EOG091E028Q	EOG09360431
uce-1869	EOG091E028T	EOG09360439
uce-1871	EOG091E0291	EOG0936043P
uce-1881	EOG091E0292	EOG0936043T
uce-1886	EOG091E0294	EOG0936043U
uce-1887	EOG091E029G	EOG0936043Y
uce-1889	EOG091E029H	EOG0936044F
uce-1890	EOG091E029K	EOG09360453
uce-1891	EOG091E029U	EOG0936045K
uce-1892	EOG091E029W	EOG0936045U
uce-1893	EOG091E02AB	EOG09360463
uce-1894	EOG091E02AL	EOG0936046G
uce-1895	EOG091E02AN	EOG0936046T
uce-1898	EOG091E02AO	EOG0936046W
uce-1901	EOG091E02AP	EOG09360474
uce-1903	EOG091E02AT	EOG09360478
uce-1904	EOG091E02AY	EOG0936047B
uce-1905	EOG091E02B1	EOG0936047E
uce-1906	EOG091E02B6	EOG0936047O
uce-1908	EOG091E02B8	EOG0936047Z
uce-1909	EOG091E02B9	EOG0936048K
uce-1910	EOG091E02BB	EOG0936048O
uce-1912	EOG091E02BQ	EOG0936048P
uce-1913	EOG091E02BY	EOG0936048T
uce-1914	EOG091E02C9	EOG09360490
uce-1915	EOG091E02CA	EOG09360491
uce-1916	EOG091E02CC	EOG0936049N
uce-1917	EOG091E02CD	EOG0936049X
uce-1918	EOG091E02CI	EOG093604AA
uce-1919	EOG091E02CM	EOG093604AD
uce-1923	EOG091E02CP	EOG093604AJ
uce-1926	EOG091E02CQ	EOG093604AV
uce-1931	EOG091E02CU	EOG093604B4
uce-1932	EOG091E02D5	EOG093604B5
uce-1934	EOG091E02DG	EOG093604B6
uce-1936	EOG091E02DJ	EOG093604B8
uce-1937	EOG091E02DR	EOG093604BC
uce-1938	EOG091E02DU	EOG093604BP
uce-1939	EOG091E02E0	EOG093604BU
uce-1945	EOG091E02E1	EOG093604BX
uce-1946	EOG091E02E3	EOG093604BZ
uce-1948	EOG091E02EB	EOG093604C7
uce-1949	EOG091E02EN	EOG093604CE
uce-1950	EOG091E02EP	EOG093604CK
uce-1951	EOG091E02ER	EOG093604CP
uce-1952	EOG091E02F0	EOG093604CQ
uce-1955	EOG091E02F1	EOG093604D4
uce-1961	EOG091E02F2	EOG093604D9
uce-1977	EOG091E02FG	EOG093604DG
uce-1978	EOG091E02FI	EOG093604DM
uce-1979	EOG091E02FN	EOG093604DP
uce-1988	EOG091E02FP	EOG093604EZ
uce-1989	EOG091E02FQ	EOG093604F0
uce-1991	EOG091E02FR	EOG093604F3
uce-1995	EOG091E02FS	EOG093604F6
uce-1996	EOG091E02FT	EOG093604FE
uce-1997	EOG091E02G0	EOG093604FM
uce-1998	EOG091E02G1	EOG093604GA
uce-2001	EOG091E02GA	EOG093604GU
uce-2005	EOG091E02GF	EOG093604GV
uce-2007	EOG091E02GM	EOG093604GZ
uce-2009	EOG091E02GR	EOG093604H0
uce-2010	EOG091E02GT	EOG093604H4
uce-2011	EOG091E02GV	EOG093604H6
uce-2014	EOG091E02GX	EOG093604HB
uce-2015	EOG091E02H2	EOG093604HD
uce-2020	EOG091E02H3	EOG093604HF
uce-2021	EOG091E02H7	EOG093604HK
uce-2022	EOG091E02HC	EOG093604I3
uce-2023	EOG091E02HI	EOG093604I4
uce-2029	EOG091E02HM	EOG093604IJ
uce-2030	EOG091E02HP	EOG093604IN
uce-2032	EOG091E02HS	EOG093604IO
uce-2034	EOG091E02HX	EOG093604JE
uce-2035	EOG091E02HZ	EOG093604JQ
uce-2036	EOG091E02I7	EOG093604JS
uce-2037	EOG091E02IJ	EOG093604JU
uce-2038	EOG091E02IP	EOG093604JV
uce-2039	EOG091E02IT	EOG093604JZ
uce-2040	EOG091E02IY	EOG093604K0
uce-2043	EOG091E02J0	EOG093604K9
uce-2046	EOG091E02J4	EOG093604KI
uce-2047	EOG091E02J7	EOG093604KN
uce-2050	EOG091E02J8	EOG093604KR
uce-2051	EOG091E02JA	EOG093604KS
uce-2052	EOG091E02JG	EOG093604KU
uce-2053	EOG091E02JN	EOG093604L8
uce-2060	EOG091E02JO	EOG093604LD
uce-2063	EOG091E02JP	EOG093604LR
uce-2064	EOG091E02JR	EOG093604LT
uce-2065	EOG091E02JY	EOG093604LZ
uce-2067	EOG091E02KC	EOG093604MB
uce-2069	EOG091E02KK	EOG093604ML
uce-2070	EOG091E02KN	EOG093604MP
uce-2071	EOG091E02KQ	EOG093604MW
uce-2072	EOG091E02KS	EOG093604N4
uce-2076	EOG091E02KY	EOG093604NA
uce-2081	EOG091E02L5	EOG093604ND
uce-2082	EOG091E02LG	EOG093604NO
uce-2083	EOG091E02LL	EOG093604O3
uce-2085	EOG091E02LO	EOG093604OG
uce-2088	EOG091E02LS	EOG093604OT
uce-2090	EOG091E02MB	EOG093604P1
uce-2092	EOG091E02MG	EOG093604P2
uce-2093	EOG091E02ML	EOG093604PI
uce-2095	EOG091E02MN	EOG093604PT
uce-2100	EOG091E02MQ	EOG093604PU
uce-2101	EOG091E02N3	EOG093604Q6
uce-2106	EOG091E02ND	EOG093604Q7
uce-2107	EOG091E02NF	EOG093604QH
uce-2108	EOG091E02NP	EOG093604QJ
uce-2111	EOG091E02NX	EOG093604QL
uce-2112	EOG091E02NY	EOG093604QT
uce-2113	EOG091E02O0	EOG093604R2
uce-2115	EOG091E02O7	EOG093604RM
uce-2119	EOG091E02O8	EOG093604RT
uce-2120	EOG091E02OB	EOG093604S2
uce-2123	EOG091E02OG	EOG093604SX
uce-2125	EOG091E02OP	EOG093604SZ
uce-2131	EOG091E02OX	EOG093604T4
uce-2133	EOG091E02P2	EOG093604TG
uce-2134	EOG091E02PA	EOG093604TO
uce-2143	EOG091E02PE	EOG093604TS
uce-2144	EOG091E02PM	EOG093604TY
uce-2147	EOG091E02PP	EOG093604UB
uce-2148	EOG091E02PS	EOG093604UF
uce-2150	EOG091E02PW	EOG093604UH
uce-2152	EOG091E02Q1	EOG093604UQ
uce-2153	EOG091E02Q5	EOG093604UV
uce-2158	EOG091E02Q7	EOG093604V1
uce-2160	EOG091E02QD	EOG093604V2
uce-2167	EOG091E02QE	EOG093604V9
uce-2169	EOG091E02QJ	EOG093604VH
uce-2175	EOG091E02QP	EOG093604VK
uce-2183	EOG091E02QR	EOG093604W3
uce-2186	EOG091E02QS	EOG093604W5
uce-2187	EOG091E02RK	EOG093604WD
uce-2189	EOG091E02RP	EOG093604WO
uce-2190	EOG091E02RQ	EOG093604WQ
uce-2193	EOG091E02RY	EOG093604WW
uce-2196	EOG091E02RZ	EOG093604X5
uce-2198	EOG091E02S0	EOG093604XC
uce-2203	EOG091E02S8	EOG093604XX
uce-2204	EOG091E02SA	EOG093604Y6
uce-2206	EOG091E02SD	EOG093604Y9
uce-2207	EOG091E02SE	EOG093604YA
uce-2213	EOG091E02SI	EOG093604YC
uce-2219	EOG091E02SW	EOG093604YG
uce-2220	EOG091E02T2	EOG093604YO
uce-2225	EOG091E02T6	EOG093604YP
uce-2230	EOG091E02T8	EOG093604Z0
uce-2233	EOG091E02TN	EOG093604ZI
uce-2237	EOG091E02U1	EOG093604ZR
uce-2248	EOG091E02U4	EOG0936050R
uce-2249	EOG091E02U8	EOG0936051C
uce-2251	EOG091E02UF	EOG0936051P
uce-2253	EOG091E02UN	EOG0936051Q
uce-2254	EOG091E02UR	EOG0936051T
uce-2266	EOG091E02US	EOG09360524
uce-2268	EOG091E02UU	EOG09360525
uce-2271	EOG091E02V6	EOG0936052S
uce-2281	EOG091E02V7	EOG09360534
uce-2289	EOG091E02VC	EOG0936053E
uce-2292	EOG091E02VD	EOG0936053F
uce-2294	EOG091E02VK	EOG0936053P
uce-2296	EOG091E02VM	EOG0936053Q
uce-2297	EOG091E02VO	EOG09360541
uce-2299	EOG091E02VQ	EOG09360543
uce-2300	EOG091E02W0	EOG09360546
uce-2301	EOG091E02W5	EOG0936054D
uce-2303	EOG091E02WA	EOG0936054F
uce-2304	EOG091E02WB	EOG0936054G
uce-2305	EOG091E02WE	EOG0936054M
uce-2306	EOG091E02WG	EOG0936054U
uce-2308	EOG091E02WV	EOG0936054V
uce-2311	EOG091E02WX	EOG0936054Z
uce-2312	EOG091E02X0	EOG09360557
uce-2313	EOG091E02X2	EOG0936055H
uce-2315	EOG091E02X4	EOG0936055O
uce-2319	EOG091E02XB	EOG0936055S
uce-2320	EOG091E02XD	EOG09360564
uce-2321	EOG091E02XE	EOG0936056C
uce-2334	EOG091E02XP	EOG0936056J
uce-2335	EOG091E02XQ	EOG0936056K
uce-2336	EOG091E02XT	EOG0936056T
uce-2337	EOG091E02XZ	EOG09360579
uce-2340	EOG091E02Y7	EOG0936057B
uce-2341	EOG091E02YA	EOG0936057I
uce-2343	EOG091E02YL	EOG0936057K
uce-2344	EOG091E02YN	EOG0936057Y
uce-2351	EOG091E02Z0	EOG0936058P
uce-2353	EOG091E02Z1	EOG0936058R
uce-2354	EOG091E02Z3	EOG09360595
uce-2356	EOG091E02Z8	EOG0936059C
uce-2360	EOG091E02ZA	EOG0936059I
uce-2361	EOG091E02ZM	EOG0936059L
uce-2364	EOG091E02ZS	EOG0936059N
uce-2365	EOG091E02ZT	EOG0936059U
uce-2366	EOG091E0304	EOG093605AK
uce-2367	EOG091E030A	EOG093605B2
uce-2368	EOG091E030H	EOG093605BP
uce-2370	EOG091E030P	EOG093605BU
uce-2371	EOG091E030R	EOG093605C3
uce-2372	EOG091E031H	EOG093605CC
uce-2373	EOG091E031T	EOG093605CQ
uce-2374	EOG091E031U	EOG093605CW
uce-2375	EOG091E031Z	EOG093605D9
uce-2376	EOG091E0321	EOG093605DA
uce-2382	EOG091E0328	EOG093605DF
uce-2383	EOG091E032G	EOG093605DG
uce-2388	EOG091E032K	EOG093605DO
uce-2391	EOG091E032Q	EOG093605DS
uce-2392	EOG091E032W	EOG093605DZ
uce-2404	EOG091E033H	EOG093605EA
uce-2408	EOG091E033P	EOG093605ER
uce-2412	EOG091E033V	EOG093605F1
uce-2414	EOG091E0343	EOG093605FH
uce-2423	EOG091E034J	EOG093605FL
uce-2424	EOG091E034P	EOG093605G2
uce-2425	EOG091E034T	EOG093605GO
uce-2426	EOG091E0355	EOG093605GZ
uce-2429	EOG091E035O	EOG093605H9
uce-2431	EOG091E035U	EOG093605HN
uce-2433	EOG091E035X	EOG093605HS
uce-2434	EOG091E0367	EOG093605HU
uce-2439	EOG091E036C	EOG093605IF
uce-2442	EOG091E036H	EOG093605IT
uce-2443	EOG091E036J	EOG093605IV
uce-2444	EOG091E036X	EOG093605J0
uce-2446	EOG091E0377	EOG093605J6
uce-2447	EOG091E037H	EOG093605JM
uce-2448	EOG091E037J	EOG093605K2
uce-2449	EOG091E037L	EOG093605K4
uce-2450	EOG091E037M	EOG093605KJ
uce-2451	EOG091E037Q	EOG093605L6
uce-2454	EOG091E0387	EOG093605LC
uce-2455	EOG091E0388	EOG093605LG
uce-2457	EOG091E038B	EOG093605LK
uce-2459	EOG091E038I	EOG093605M5
uce-2472	EOG091E038K	EOG093605ME
uce-2475	EOG091E038M	EOG093605MR
uce-2493	EOG091E038Q	EOG093605N3
uce-2494	EOG091E038X	EOG093605NB
uce-2499	EOG091E0394	EOG093605NJ
uce-2500	EOG091E0395	EOG093605NL
uce-2501	EOG091E0397	EOG093605NU
uce-2503	EOG091E039I	EOG093605OJ
uce-2505	EOG091E039T	EOG093605OS
uce-2506	EOG091E03A2	EOG093605OT
uce-2509	EOG091E03AB	EOG093605P0
uce-2512	EOG091E03AG	EOG093605P3
uce-2513	EOG091E03AJ	EOG093605PB
uce-2527	EOG091E03AT	EOG093605PD
uce-2529	EOG091E03AV	EOG093605PR
uce-2531	EOG091E03B0	EOG093605PS
uce-2532	EOG091E03B9	EOG093605Q4
uce-2534	EOG091E03BB	EOG093605QO
uce-2535	EOG091E03BF	EOG093605QW
uce-2536	EOG091E03BJ	EOG093605R4
uce-2538	EOG091E03BK	EOG093605R5
uce-2543	EOG091E03BR	EOG093605RC
uce-2544	EOG091E03BW	EOG093605RL
uce-2547	EOG091E03BY	EOG093605RP
uce-2553	EOG091E03CD	EOG093605S5
uce-2556	EOG091E03CG	EOG093605SL
uce-2560	EOG091E03CQ	EOG093605SU
uce-2561	EOG091E03CV	EOG093605T0
uce-2562	EOG091E03D1	EOG093605T6
uce-2565	EOG091E03D3	EOG093605TB
uce-2572	EOG091E03D7	EOG093605TD
uce-2573	EOG091E03DB	EOG093605TG
uce-2577	EOG091E03DI	EOG093605TK
uce-2579	EOG091E03DU	EOG093605TL
uce-2580	EOG091E03DV	EOG093605TN
uce-2581	EOG091E03DZ	EOG093605TV
uce-2583	EOG091E03E2	EOG093605U7
uce-2587	EOG091E03EL	EOG093605UA
uce-2590	EOG091E03ES	EOG093605UB
uce-2594	EOG091E03F1	EOG093605UU
uce-2598	EOG091E03FB	EOG093605UZ
uce-2599	EOG091E03FD	EOG093605V9
uce-2600	EOG091E03FE	EOG093605VH
uce-2605	EOG091E03FK	EOG093605VV
uce-2612	EOG091E03FM	EOG093605VY
uce-2614	EOG091E03FQ	EOG093605W3
uce-2619	EOG091E03G9	EOG093605W6
uce-2629	EOG091E03GJ	EOG093605WF
uce-2630	EOG091E03GR	EOG093605X1
uce-2631	EOG091E03H2	EOG093605XE
uce-2636	EOG091E03HA	EOG093605XN
uce-2637	EOG091E03HF	EOG093605XQ
uce-2638	EOG091E03HJ	EOG093605XR
uce-2639	EOG091E03ID	EOG093605XW
uce-2640	EOG091E03IH	EOG093605XY
uce-2649	EOG091E03JI	EOG093605XZ
uce-2661	EOG091E03JU	EOG093605Y2
uce-2663	EOG091E03K1	EOG093605YI
uce-2664	EOG091E03KJ	EOG093605YJ
uce-2666	EOG091E03KQ	EOG093605YQ
uce-2667	EOG091E03KZ	EOG093605YX
uce-2673	EOG091E03M9	EOG093605Z6
uce-2674	EOG091E03MD	EOG093605Z9
uce-2676	EOG091E03NM	EOG093605ZB
uce-2684	EOG091E03O4	EOG093605ZP
uce-2688	EOG091E03O5	EOG093605ZW
uce-2705	EOG091E03OS	EOG0936060D
uce-2710	EOG091E03OX	EOG0936060E
uce-2711	EOG091E03PF	EOG0936060L
uce-2719	EOG091E03Q4	EOG0936060R
uce-2723	EOG091E03RZ	EOG0936060T
uce-2724	EOG091E03U1	EOG0936060Z
uce-2732	EOG091E03U6	EOG09360611
uce-2733	EOG091E03U9	EOG09360615
uce-2734	EOG091E03UQ	EOG09360618
uce-2739	EOG091E03WK	EOG0936061C
uce-2740	EOG091E043W	EOG0936061F
uce-2742	EOG091E049I	EOG0936061L
uce-2744	EOG091E04F3	EOG09360624
uce-2746	EOG091E04GJ	EOG0936062B
uce-2748	EOG091E04L9	EOG0936062G
uce-2749	EOG091E04NR	EOG0936062H
uce-2751	EOG091E04OJ	EOG0936062N
uce-2754	EOG091E04QC	EOG09360636
uce-2756	EOG091E04R8	EOG0936063N
uce-2758	EOG091E04WI	EOG0936064H
uce-2760	EOG091E053H	EOG0936064Q
uce-2766	EOG091E0569	EOG0936064U
uce-2772	EOG091E06LE	EOG09360658
uce-2777		EOG0936065B
uce-2789		EOG0936065D
uce-2792		EOG0936065V
uce-2793		EOG0936065X
uce-2796		EOG0936066M
uce-2797		EOG0936066R
uce-2798		EOG0936066T
uce-2801		EOG0936066Y
uce-2802		EOG09360676
uce-2804		EOG09360678
uce-2810		EOG09360679
uce-2817		EOG0936067H
uce-2819		EOG0936067L
uce-2822		EOG0936068D
uce-2825		EOG0936068L
uce-2826		EOG0936068O
uce-2828		EOG0936068S
uce-2830		EOG0936069A
uce-2833		EOG0936069O
uce-2834		EOG0936069W
uce-2835		EOG0936069X
uce-2845		EOG093606A0
uce-2856		EOG093606A7
uce-2863		EOG093606AJ
uce-2884		EOG093606AY
uce-2886		EOG093606B1
uce-2889
uce-2891
uce-2892
uce-2894
uce-2898
uce-2902
uce-2903
uce-2923
uce-2924
uce-2925
uce-2926
uce-2927
uce-2928
uce-2929
uce-2930
uce-2931
uce-2932
uce-2933
uce-2934
uce-2940
uce-2948
uce-2951
uce-2952
uce-2953
uce-2955
uce-2957
uce-2968
uce-2969
uce-2970
uce-2972
uce-2974
uce-2976
uce-2983
uce-2998
uce-3002
uce-3004
uce-3005
uce-3007
uce-3008
uce-3010
uce-3011
uce-3016
uce-3017
uce-3018
uce-3019
uce-3020
uce-3021
uce-3022
uce-3023
uce-3024
uce-3025
uce-3026
uce-3030
uce-3033
uce-3036
uce-3038
uce-3039
uce-3041
uce-3043
uce-3057
uce-3058
uce-3060
uce-3062
uce-3065
uce-3067
uce-3069
uce-3072
uce-3074
uce-3076
uce-3079
uce-3091
uce-3092
uce-3093
uce-3094
uce-3096
uce-3098
uce-3107
uce-3109
uce-3125
uce-3128
uce-3129
uce-3131
uce-3135
uce-3136
uce-3137
uce-3141
uce-3143
uce-3150
uce-3153
uce-3154
uce-3155
uce-3159
uce-3160
uce-3161
uce-3165
uce-3174
uce-3175
uce-3178
uce-3180
uce-3182
uce-3183
uce-3184
uce-3185
uce-3201
uce-3202
uce-3208
uce-3209
uce-3211
uce-3214
uce-3216
uce-3217
uce-3218
uce-3219
uce-3220
uce-3221
uce-3223
uce-3224
uce-3225
uce-3230
uce-3231
uce-3232
uce-3239
uce-3240
uce-3241
uce-3243
uce-3244
uce-3245
uce-3259
uce-3263
uce-3268
uce-3270
uce-3271
uce-3282
uce-3290
uce-3291
uce-3292
uce-3293
uce-3299
uce-3302
uce-3303
uce-3304
uce-3306
uce-3307
uce-3308
uce-3309
uce-3310
uce-3311
uce-3313
uce-3317
uce-3318
uce-3337
uce-3338
uce-3342
uce-3343
uce-3344
uce-3349
uce-3350
uce-3351
uce-3358
uce-3360
uce-3361
uce-3365
uce-3371
uce-3372
uce-3373
uce-3375
uce-3378
uce-3392
uce-3393
uce-3394
uce-3395
uce-3396
uce-3397
uce-3400
uce-3403
uce-3404
uce-3405
uce-3407
uce-3410
uce-3411
uce-3414
uce-3415
uce-3416
uce-3417
uce-3418
uce-3419
uce-3420
uce-3421
uce-3423
uce-3441
uce-3443
uce-3444
uce-3446
uce-3447
uce-3451
uce-3454
uce-3455
uce-3458
uce-3460
uce-3461
uce-3462
uce-3464
uce-3467
uce-3478
uce-3479
uce-3481
uce-3482
uce-3483
uce-3484
uce-3486
uce-3487
uce-3489
uce-3491
uce-3492
uce-3494
uce-3495
uce-3498
uce-3499
uce-3500
uce-3504
uce-3506
uce-3508
uce-3510
uce-3511
uce-3513
uce-3514
uce-3515
uce-3520
uce-3530
uce-3531
uce-3532
uce-3534
uce-3541
uce-3542
uce-3543
uce-3544
uce-3555
uce-3556
uce-3557
uce-3559
uce-3560
uce-3561
uce-3566
uce-3568
uce-3570
uce-3575
uce-3579
uce-3583
uce-3584
uce-3586
uce-3587
uce-3588
uce-3589
uce-3590
uce-3591
uce-3592
uce-3594
uce-3598
uce-3601
uce-3607
uce-3608
uce-3614
uce-3617
uce-3618
uce-3625
uce-3626
uce-3634
uce-3635
uce-3642
uce-3643
uce-3648
uce-3655
uce-3656
uce-3659
uce-3660
uce-3662
uce-3664
uce-3666
uce-3669
uce-3672
uce-3675
uce-3676
uce-3677
uce-3678
uce-3679
uce-3689
uce-3691
uce-3692
uce-3695
uce-3698
uce-3701
uce-3703
uce-3705
uce-3708
uce-3714
uce-3715
uce-3722
uce-3723
uce-3724
uce-3725
uce-3726
uce-3729
uce-3732
uce-3734
uce-3748
uce-3751
uce-3752
uce-3754
uce-3755
uce-3756
uce-3757
uce-3762
uce-3768
uce-3769
uce-3771
uce-3774
uce-3776
uce-3777
uce-3779
uce-3782
uce-3787
uce-3789
uce-3790
uce-3795
uce-3804
uce-3807
uce-3808
uce-3811
uce-3817
uce-3818
uce-3819
uce-3823
uce-3824
uce-3829
uce-3831
uce-3835
uce-3838
uce-3839
uce-3840
uce-3848
uce-3850
uce-3851
uce-3852
uce-3856
uce-3857
uce-3861
uce-3862
uce-3879
uce-3880
uce-3882
uce-3886
uce-3889
uce-3890
uce-3895
uce-3896
uce-3897
uce-3900
uce-3903
uce-3908
uce-3909
uce-3913
uce-3918
uce-3919
uce-3924
uce-3933
uce-3935
uce-3937
uce-3954
uce-3958
uce-3962
uce-3963
uce-3969
uce-3970
uce-3975
uce-3976
uce-3977
uce-3980
uce-3984
uce-3986
uce-3988
uce-3998
uce-4003
uce-4004
uce-4005
uce-4006
uce-4008
uce-4025
uce-4027
uce-4029
uce-4032
uce-4034
uce-4035
uce-4036
uce-4041
uce-4043
uce-4048
uce-4055
uce-4058
uce-4062
uce-4130
uce-4134
uce-4137
uce-4140
uce-4141
uce-4143
uce-4147
uce-4148
uce-4149
uce-4150
uce-4151
uce-4152
uce-4160
uce-4163
uce-4177
uce-4183
uce-4184
uce-4185
uce-4187
uce-4188
uce-4189
uce-4190
uce-4196
uce-4199
uce-4201
uce-4204
uce-4205
uce-4206
uce-4208
uce-4209
uce-4210
uce-4212
uce-4215
uce-4223
uce-4225
uce-4228
uce-4229
uce-4230
uce-4231
uce-4243
uce-4252
uce-4255
uce-4256
uce-4257
uce-4262
uce-4263
uce-4264
uce-4265
uce-4267
uce-4270
uce-4272
uce-4273
uce-4275
uce-4285
uce-4286
uce-4289
uce-4290
uce-4291
uce-4298
uce-4301
uce-4308
uce-4310
uce-4312
uce-4323
uce-4326
uce-4327
uce-4329
uce-4330
uce-4332
uce-4333
uce-4334
uce-4335
uce-4336
uce-4338
uce-4340
uce-4341
uce-4342
uce-4343
uce-4345
uce-4347
uce-4350
uce-4351
uce-4353
uce-4355
uce-4357
uce-4358
uce-4362
uce-4370
uce-4374
uce-4376
uce-4385
uce-4386
uce-4387
uce-4388
uce-4394
uce-4396
uce-4397
uce-4399
uce-4400
uce-4403
uce-4407
uce-4408
uce-4413
uce-4418
uce-4422
uce-4429
uce-4432
uce-4436
uce-4443
uce-4444
uce-4455
uce-4458
uce-4459
uce-4461
uce-4470
uce-4473
uce-4475
uce-4476
uce-4477
uce-4478
uce-4479
uce-4480
uce-4482
uce-4483
uce-4484
uce-4485
uce-4486
uce-4491
uce-4493
uce-4498
uce-4499
uce-4500
uce-4502
uce-4505
uce-4507
uce-4512
uce-4514
uce-4515
uce-4517
uce-4518
uce-4519
uce-4521
uce-4523
uce-4526
uce-4528
uce-4530
uce-4531
uce-4533
uce-4534
uce-4540
uce-4541
uce-4543
uce-4546
uce-4551
uce-4559
uce-4562
uce-4564
uce-4565
uce-4566
uce-4567
uce-4574
uce-4575
uce-4578
uce-4579
uce-4580
uce-4582
uce-4584
uce-4586
uce-4587
uce-4600
uce-4601
uce-4602
uce-4603
uce-4604
uce-4605
uce-4611
uce-4612
uce-4614
uce-4616
uce-4617
uce-4620
uce-4624
uce-4631
uce-4640
uce-4641
uce-4655
uce-4656
uce-4657
uce-4658
uce-4659
uce-4660
uce-4661
uce-4664
uce-4680
uce-4700
uce-4701
uce-4703
uce-4704
uce-4705
uce-4706
uce-4707
uce-4708
uce-4709
uce-4710
uce-4711
uce-4717
uce-4718
uce-4720
uce-4725
uce-4726
uce-4727
uce-4728
uce-4729
uce-4732
uce-4738
uce-4739
uce-4743
uce-4744
uce-4745
uce-4746
uce-4747
uce-4748
uce-4749
uce-4753
uce-4757
uce-4759
uce-4763
uce-4764
uce-4765
uce-4766
uce-4767
uce-4768
uce-4773
uce-4793
uce-4794
uce-4795
uce-4802
uce-4806
uce-4808
uce-4810
uce-4811
uce-4812
uce-4814
uce-4815
uce-4816
uce-4817
uce-4821
uce-4824
uce-4826
uce-4883
uce-4886
uce-4893
uce-4903
uce-4905
uce-4908
uce-4909
uce-4913
uce-4914
uce-4915
uce-4916
uce-4920
uce-4921
uce-4922
uce-4923
uce-4924
uce-4925
uce-4927
uce-4931
uce-4933
uce-4934
uce-4935
uce-4945
uce-4948
uce-4949
uce-4953
uce-4956
uce-4960
uce-4961
uce-4963
uce-4964
uce-4965
uce-4968
uce-4969
uce-4970
uce-4972
uce-4973
uce-4974
uce-4976
uce-4977
uce-4978
uce-4981
uce-4982
uce-4983
uce-4985
uce-4988
uce-4989
uce-4990
uce-4991
uce-4994
uce-4996
uce-5004
uce-5009
uce-5011
uce-5014
uce-5020
uce-5023
uce-5028
uce-5029
uce-5031
uce-5033
uce-5037
uce-5042
uce-5043
uce-5044
uce-5049
uce-5056
uce-5057
uce-5060
uce-5063
uce-5066
uce-5068
uce-5070
uce-5077
uce-5079
uce-5080
uce-5083
uce-5085
uce-5088
uce-5089
uce-5091
uce-5092
uce-5093
uce-5096
uce-5100
uce-5103
uce-5109
uce-5110
uce-5111
uce-5114
uce-5115
uce-5124
uce-5125
uce-5130
uce-5131
uce-5133
uce-5134
uce-5135
uce-5136
uce-5137
uce-5141
uce-5142
uce-5148
uce-5150
uce-5152
uce-5153
uce-5156
uce-5157
uce-5158
uce-5159
uce-5160
uce-5166
uce-5169
uce-5193
uce-5195
uce-5199
uce-5200
uce-5207
uce-5214
uce-5222
uce-5223
uce-5224
uce-5226
uce-5233
uce-5234
uce-5235
uce-5243
uce-5244
uce-5245
uce-5248
uce-5252
uce-5257
uce-5258
uce-5259
uce-5260
uce-5262
uce-5263
uce-5265
uce-5272
uce-5282
uce-5283
uce-5285
uce-5290
uce-5297
uce-5298
uce-5303
uce-5304
uce-5305
uce-5309
uce-5311
uce-5312
uce-5314
uce-5319
uce-5320
uce-5322
uce-5326
uce-5335
uce-5339
uce-5340
uce-5341
uce-5345
uce-5346
uce-5347
uce-5348
uce-5349
uce-5351
uce-5352
uce-5358
uce-5362
uce-5363
uce-5364
uce-5366
uce-5369
uce-5370
uce-5371
uce-5377
uce-5387
uce-5390
uce-5391
uce-5392
uce-5394
uce-5395
uce-5398
uce-5410
uce-5416
uce-5419
uce-5420
uce-5421
uce-5422
uce-5426
uce-5427
uce-5429
uce-5435
uce-5436
uce-5437
uce-5438
uce-5458
uce-5459
uce-5460
uce-5470
uce-5477
uce-5481
uce-5482
uce-5483
uce-5486
uce-5492
uce-5493
uce-5495
uce-5499
uce-5502
uce-5503
uce-5508
uce-5511
uce-5512
uce-5522
uce-5523
uce-5524
uce-5527
uce-5528
uce-5529
uce-5530
uce-5532
uce-5533
uce-5534
uce-5535
uce-5542
uce-5543
uce-5552
uce-5556
uce-5557
uce-5558
uce-5559
uce-5564
uce-5565
uce-5566
uce-5567
uce-5568
uce-5585
uce-5588
uce-5591
uce-5592
uce-5593
uce-5595
uce-5597
uce-5601
uce-5602
uce-5606
uce-5611
uce-5612
uce-5613
uce-5614
uce-5615
uce-5616
uce-5621
uce-5622
uce-5624
uce-5626
uce-5637
uce-5641
uce-5643
uce-5647
uce-5649
uce-5651
uce-5652
uce-5656
uce-5657
uce-5659
uce-5661
uce-5673
uce-5675
uce-5676
uce-5677
uce-5679
uce-5682
uce-5684
uce-5685
uce-5688
uce-5689
uce-5690
uce-5692
uce-5697
uce-5699
uce-5701
uce-5704
uce-5705
uce-5707
uce-5709
uce-5710
uce-5711
uce-5714
uce-5718
uce-5721
uce-5724
uce-5725
uce-5726
uce-5727
uce-5728
uce-5729
uce-5730
uce-5731
uce-5732
uce-5741
uce-5743
uce-5746
uce-5748
uce-5755
uce-5759
uce-5769
uce-5773
uce-5778
uce-5779
uce-5780
uce-5781
uce-5782
uce-5783
uce-5784
uce-5785
uce-5786
uce-5787
uce-5788
uce-5798
uce-5799
uce-5800
uce-5802
uce-5806
uce-5807
uce-5809
uce-5810
uce-5815
uce-5816
uce-5819
uce-5820
uce-5841
uce-5843
uce-5844
uce-5848
uce-5851
uce-5852
uce-5854
uce-5857
uce-5865
uce-5866
uce-5867
uce-5868
uce-5869
uce-5870
uce-5884
uce-5885
uce-5899
uce-5910
uce-5917
[truncated: 38 more rows]
